# Supplementary material for: Associations between Milk Fatty Acid Profile and Body Condition Score, Ultrasound Hepatic Measurements and Blood Metabolites in Holstein Cows
Source: MDPI journal article supplement (doi:10.3390/ani12091202), 2022-05-06
Supplement: s1 [file s1]

## Supplementary Materials

**Table S1.** Descriptive statistics for milk production traits and individual fatty acids (n = 297).

| Traits <sup>1</sup>                      | Common Name                   | Mean  | SD   | P1 <sup>2</sup> | P99 <sup>2</sup> |
|------------------------------------------|-------------------------------|-------|------|-----------------|------------------|
| Milk yield, kg                           |                               | 37.86 | 8.31 | 20.54           | 59.03            |
| Milk composition, kg                     |                               |       |      |                 |                  |
| Fat                                      |                               | 3.55  | 0.71 | 1.78            | 5.36             |
| Protein                                  |                               | 3.22  | 0.41 | 2.59            | 3.88             |
| Individual fatty acids, g/100 g of total |                               |       |      |                 |                  |
| SFA                                      |                               |       |      |                 |                  |
| 4:0                                      | Butyric acid                  | 1.66  | 0.31 | 1.09            | 2.42             |
| 6:0                                      | Caproic acid                  | 1.66  | 0.28 | 1.03            | 2.47             |
| 8:0                                      | Caprylic acid                 | 1.25  | 0.20 | 0.74            | 1.75             |
| 10:0                                     | Capric acid                   | 2.97  | 0.57 | 1.45            | 4.06             |
| 11:0                                     | Undecanoic acid               | 0.11  | 0.05 | 0.02            | 0.23             |
| 12:0                                     | Lauric acid                   | 3.55  | 0.72 | 1.66            | 4.93             |
| 13:0 iso                                 | iso Tridecanoic acid          | 0.03  | 0.01 | 0.01            | 0.05             |
| 13:0                                     | Tridecanoic acid              | 0.24  | 0.08 | 0.08            | 0.42             |
| 14:0 iso                                 | iso Tetradecanoic acid        | 0.12  | 0.03 | 0.05            | 0.19             |
| 14:0                                     | Myristic acid                 | 11.02 | 1.37 | 7.47            | 13.66            |
| 15:0 iso                                 | iso Pentadecanoic acid        | 0.20  | 0.04 | 0.12            | 0.29             |
| 15:0 ante                                | ante Pentadecanoic acid       | 0.41  | 0.06 | 0.24            | 0.54             |
| 15:0                                     | Pentadecanoic acid            | 1.28  | 0.30 | 0.62            | 1.89             |
| 16:0 iso                                 | iso Hexadecanoic acid         | 0.25  | 0.06 | 0.16            | 0.43             |
| 16:0                                     | Palmitic acid                 | 30.62 | 2.73 | 25.66           | 38.03            |
| 17:0 iso                                 | iso Heptadecanoic acid        | 0.33  | 0.04 | 0.24            | 0.45             |
| 17:0 ante                                | ante Heptadecanoic acid       | 0.43  | 0.08 | 0.30            | 0.63             |
| 17:0                                     | Margaric acid                 | 0.57  | 0.09 | 0.41            | 0.84             |
| 18:0                                     | Stearic acid                  | 10.93 | 2.18 | 6.71            | 16.81            |
| 20:0                                     | Arachidic acid                | 0.18  | 0.04 | 0.10            | 0.29             |
| 22:0                                     | Behenic acid                  | 0.06  | 0.02 | 0.03            | 0.10             |
| 24:0                                     | Lignoceric acid               | 0.04  | 0.01 | 0.02            | 0.08             |
| MUFA                                     |                               |       |      |                 |                  |
| 10:1 (c9)                                | Caproleic acid                | 0.28  | 0.07 | 0.07            | 0.42             |
| 14:1 (c9)                                | Myristoleic acid              | 0.84  | 0.24 | 0.33            | 1.40             |
| 16:1 (t9)                                | Palmitelaidic acid            | 0.20  | 0.04 | 0.13            | 0.29             |
| 16:1 (c9)                                | Palmitoleic acid              | 1.44  | 0.36 | 0.72            | 2.51             |
| 18:1 (t6+t8)                             | Trans 6-8-Octadecenoic acid   | 0.16  | 0.03 | 0.11            | 0.25             |
| 18:1 (t9)                                | Elaidic acid                  | 0.30  | 0.06 | 0.19            | 0.53             |
| 18:1 (t10)                               | Trans 10-Octadecenoic acid    | 0.40  | 0.16 | 0.17            | 1.10             |
| 18:1 (t11)                               | Vaccenic acid                 | 0.61  | 0.15 | 0.38            | 1.10             |
| 18:1 (c9)                                | Oleic acid                    | 20.18 | 3.35 | 12.66           | 28.95            |
| 18:1 (c12)                               | Cis 12-Octadecenoic acid      | 0.39  | 0.10 | 0.16            | 0.65             |
| 18:1 (t16+c14)                           | Trans 16 + cis14 Octadecenoic | 0.25  | 0.05 | 0.12            | 0.34             |
| 20:1 (c9)                                | Gadoleic acid                 | 0.11  | 0.02 | 0.06            | 0.16             |
| PUFA                                     |                               |       |      |                 |                  |
| 18:2 (t9, t12)                           | Linoelaidic acid              | 0.24  | 0.05 | 0.14            | 0.37             |
| 18:2 (c9, c12)                           | Linoleic acid                 | 2.61  | 0.76 | 0.16            | 3.95             |

|                               |                          |      |      |      |      |
|-------------------------------|--------------------------|------|------|------|------|
| 18:3 (c9, c12, c15)           | $\alpha$ -Linolenic acid | 0.44 | 0.09 | 0.10 | 0.61 |
| 18:2 (c9, t11)                | Rumenic acid             | 0.30 | 0.08 | 0.06 | 0.47 |
| 20:3 (c8, c11, c14)           | Eicosatrienoic acid      | 0.14 | 0.04 | 0.02 | 0.23 |
| 20:4 (c5, c8, c11, c14)       | Arachidonic acid         | 0.17 | 0.04 | 0.07 | 0.27 |
| 20:5 (c5, c8, c11, c14, c17)  | Eicosapentaenoic acid    | 0.05 | 0.01 | 0.02 | 0.09 |
| 22:4 (c7, c10, c13, c16)      | Docosatetraenoic acid    | 0.05 | 0.02 | 0.02 | 0.12 |
| 22:5 (c7, c10, c13, c16, c19) | Docopentaenoic acid      | 0.09 | 0.02 | 0.04 | 0.13 |

<sup>1</sup>c = cis; t = trans; SFA = saturated fatty acids; MUFA = monounsaturated fatty acids; PUFA = polyunsaturated fatty acids.<sup>2</sup>P1 = 1st percentile; P99 = 99th percentile.

**Table S2.** Descriptive statistics for all indicators of metabolic stress (n = 297).

| Traits <sup>1</sup>                          | Mean    | SD     | P1 <sup>2</sup> | P99 <sup>2</sup> |
|----------------------------------------------|---------|--------|-----------------|------------------|
| Body measure                                 |         |        |                 |                  |
| BCS, score                                   | 3.10    | 0.24   | 2.50            | 3.50             |
| Ultrasound measurements                      |         |        |                 |                  |
| pTAG, mg/g                                   | 69.76   | 10.20  | 50.75           | 94.67            |
| PVA, mm <sup>2</sup>                         | 1110.03 | 287.66 | 567.88          | 1886.19          |
| PVD, mm                                      | 129.71  | 12.98  | 95.87           | 161.26           |
| LD, mm                                       | 148.75  | 13.02  | 117.36          | 178.84           |
| Hematochemical parameters                    |         |        |                 |                  |
| Hematocrit, l/l                              | 0.31    | 0.03   | 0.24            | 0.36             |
| Energy-related metabolites                   |         |        |                 |                  |
| Glucose, mmol/L                              | 4.35    | 0.39   | 3.29            | 5.22             |
| Cholesterol, mmol/L                          | 4.63    | 1.23   | 1.90            | 7.88             |
| NEFA, mmol/L                                 | 0.18    | 0.22   | 0.04            | 1.05             |
| BHB, mmol/L                                  | 0.56    | 0.26   | 0.27            | 1.30             |
| Urea, mmol/L                                 | 6.30    | 1.07   | 4.10            | 8.77             |
| Creatinine, $\mu$ mol/L                      | 81.82   | 6.37   | 71.74           | 99.47            |
| Liver function/hepatic damage                |         |        |                 |                  |
| AST, U/L                                     | 96.06   | 24.18  | 68.25           | 166.05           |
| GGT, U/L                                     | 25.65   | 10.36  | 13.32           | 75.39            |
| BILt, $\mu$ mol/L                            | 2.65    | 1.80   | 0.68            | 11.05            |
| Albumin, g/L                                 | 37.01   | 2.30   | 30.60           | 42.04            |
| ALP, U/L                                     | 63.55   | 23.64  | 22.70           | 134.21           |
| PON, U/mL                                    | 105.87  | 20.64  | 53.87           | 158.27           |
| Oxidative stress metabolites                 |         |        |                 |                  |
| ROMt, mgH <sub>2</sub> O <sub>2</sub> /100mL | 12.44   | 3.26   | 5.00            | 20.24            |
| AOPP, $\mu$ mol/L                            | 45.82   | 9.54   | 25.50           | 70.63            |
| FRAP, $\mu$ mol/L                            | 198.42  | 72.83  | 125.28          | 331.55           |
| SHp, $\mu$ mol/l                             | 376.92  | 48.64  | 266.67          | 510.25           |
| Inflammation/innate immunity                 |         |        |                 |                  |
| Ceruloplasmin, $\mu$ mol/L                   | 1.80    | 0.61   | 0.79            | 3.73             |
| PROTt, g/L                                   | 80.71   | 4.93   | 69.06           | 95.07            |
| Globulins, g/L                               | 43.69   | 5.32   | 34.28           | 59.17            |
| Haptoglobin, g/L                             | 0.39    | 0.34   | 0.10            | 1.50             |
| MPO, U/L                                     | 453.97  | 68.07  | 286.10          | 663.21           |
| Minerals                                     |         |        |                 |                  |
| Ca, mmol/L                                   | 2.52    | 0.12   | 2.19            | 2.78             |
| P, mmol/L                                    | 1.95    | 0.36   | 1.07            | 2.82             |

|                 |        |      |        |        |
|-----------------|--------|------|--------|--------|
| Mg, mmol/L      | 1.00   | 0.10 | 0.72   | 1.22   |
| Na, mmol/L      | 142.21 | 3.04 | 135.26 | 148.12 |
| K, mmol/L       | 4.10   | 0.42 | 3.07   | 5.06   |
| Cl, mmol/L      | 101.48 | 3.22 | 92.95  | 109.15 |
| Zn, $\mu$ mol/L | 11.29  | 2.79 | 6.37   | 20.96  |

---

<sup>1</sup> BCS = body condition score; pTAG = predicted liver triacylglycerol; PVA = portal vein area; PVD = portal vein depth; LD = liver depth; NEFA = non-esterified fatty acids; BHB =  $\beta$ -Hydroxybutyrate; AST = aspartate aminotransferase; GGT =  $\gamma$ -glutamyl transferase; BILt = total bilirubin; ALP = alkaline phosphatase; PON = paraoxonase; ROMt =total reactive oxygen metabolites; AOPP = advanced oxidation protein products; FRAP = ferric reducing antioxidant power; SHp = total thiol groups; PROTt = total proteins; MPO = myeloperoxidase. <sup>2</sup> P1 = 1st percentile; P99 = 99th percentile.
